# Supplementary material for: Who funded the research behind the Oxford–AstraZeneca COVID-19 vaccine?
Source: PubMed Central journal article supplement — BMJ Glob Health. 2021 Dec 22;6(12):e007321. doi: 10.1136/bmjgh-2021-007321 (PMC8704023; doi:10.1136/bmjgh-2021-007321), 2021-12-22

**Appendix 1 – Search Strategy**

Embase Ovid (1974 to 26th October 2020) searched 26<sup>th</sup> October 2020

| No. | Search Terms                                                                                                                                                                                                                                          | Results |
|-----|-------------------------------------------------------------------------------------------------------------------------------------------------------------------------------------------------------------------------------------------------------|---------|
| 1   | Coronavir\$ or "corona virus" or \$coronavirus or covid19 or "covid 19" or nCoV or "CoV 2" or CoV2 or sarscov2 or 2019nCoV or "novel CoV" or "wuhan virus" or ((wuhan or hubei or huanan) and ("severe acute respiratory" or pneumonia) and outbreak) |         |
| 2   | ChAdOx1 or ChAdOx2 or Chimpanzee adenovirus-vectored or AZD1222 or MN908947 or spike protein                                                                                                                                                          |         |
| 3   | 1 OR 2                                                                                                                                                                                                                                                |         |
| 4   | Vaccitech or AstraZeneca or AZC or Oxford or Jenner or JI                                                                                                                                                                                             |         |
| 5   | 3 AND 4                                                                                                                                                                                                                                               | 166     |

Pubmed (1946 to 29<sup>th</sup> November 2020) searched on 29<sup>th</sup> November 2020

| No. | Search Terms         | Results |
|-----|----------------------|---------|
| 1   | Adrian Hill [Author] | 418     |

Pubmed (1946 to 29<sup>th</sup> November 2020) searched on 29<sup>th</sup> November 2020

| No. | Search Terms           | Results |
|-----|------------------------|---------|
| 1   | Sarah Gilbert [Author] | 199     |

**Figure 1 - PRISMA Flow Diagram scoping review of the academic literature on the ChAdOx technology**

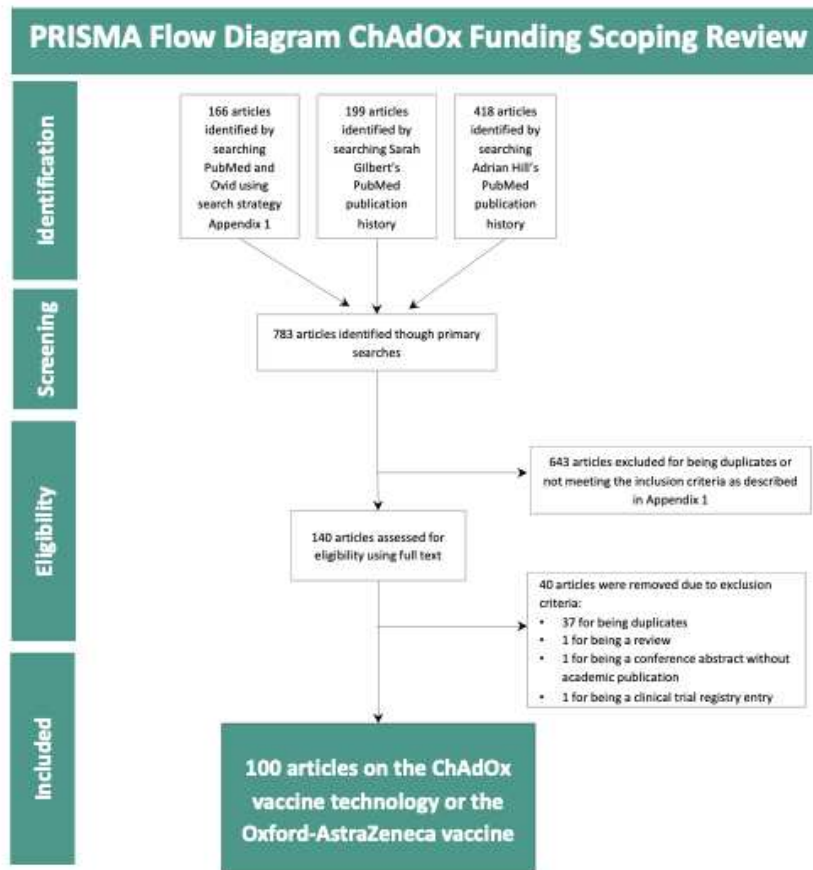

Supplement: bmjgh-2021-007321supp001.pdf [file bmjgh-2021-007321supp001.pdf]
