# Supplementary material for: Who funded the research behind the Oxford–AstraZeneca COVID-19 vaccine?
Source: PubMed Central journal article supplement — BMJ Glob Health. 2021 Dec 22;6(12):e007321. doi: 10.1136/bmjgh-2021-007321 (PMC8704023; doi:10.1136/bmjgh-2021-007321), 2021-12-22
Supplement: bmjgh-2021-007321supp003.pdf [file bmjgh-2021-007321supp003.pdf]

| <b>SUMMARY OF DONATIONS (CASH RECEIVED) TO THE UNIVERSITY OF OXFORD IN SUPPORT OF PROFESSOR SARAH GILBERT AND PROFESSOR ADRIAN HILL to 17/12/2020</b> |                     |             |                                                                                                                 |
|-------------------------------------------------------------------------------------------------------------------------------------------------------|---------------------|-------------|-----------------------------------------------------------------------------------------------------------------|
| <b>Donor</b>                                                                                                                                          | <b>Donation</b>     | <b>Date</b> | <b>Title of funding</b>                                                                                         |
| Anonymous                                                                                                                                             | £750,000 - £999,999 | 15/04/2020  | To support Professor Adrian Hill's work on COVID-19 vaccine                                                     |
| Anonymous                                                                                                                                             | £100,000 - £249,999 | 15/04/2020  | To support Professor Adrian Hill's work on COVID-19 vaccine development                                         |
| Anonymous                                                                                                                                             | £100,000 - £249,999 | 21/04/2020  | To scale production and manufacturing of Oxford's Vaccine Candidate; Jenner Institute for Professor Adrian Hill |
| FIAP, International Federation of Photographic Art                                                                                                    | £25,000 - £49,999   | 14/09/2020  | Professor Adrian Hill and Professor Sarah Gilbert – vaccine research                                            |
| Karin B. Sinniger                                                                                                                                     | £25,000 - £49,999   | 12/05/2020  | To support Professor Adrian Hill's vaccine research                                                             |
| Lakshmi Mittal                                                                                                                                        | £500,000 - £750,000 | 03/07/2020  | Lakshmi Mittal and Family Professorship for Vaccinology, Professor Adrian Hill                                  |
| Richard A. Sanders                                                                                                                                    | £250,000 - £499,999 | 23/04/2020  | Professor Adrian Hill and Professor Sarah Gilbert – vaccine research                                            |
| TrustBridge Global                                                                                                                                    | £25,000 - £49,999   | 13/08/2020  | Professor Adrian Hill and Professor Sarah Gilbert – vaccine research                                            |
| Wafic R. Saïd                                                                                                                                         | Confidential        | 28/07/2020  | Saïd Professorship of Vaccinology, Professor Sarah Gilbert                                                      |

| Sponsor                                                     | Project Number | Funding Type           | Project Name                                                                                                                                                            | Principal Investigator | Project Start Date | Project End Date | Total Budget | Classification                      |
|-------------------------------------------------------------|----------------|------------------------|-------------------------------------------------------------------------------------------------------------------------------------------------------------------------|------------------------|--------------------|------------------|--------------|-------------------------------------|
| European Commission                                         | HCRGZJ00       | EU Government          | AN INTEGRATED PROJECT FOR THE DESIGN & TESTING OF VACCINE CANDIDATES AGAINST TUBERCULOSIS:IDENTIFICATION                                                                | Hill, Prof. Adrian     | 01-Jan-2004        | 31-Jan-2010      | 37,100.17    | Other vaccine research              |
| European Commission                                         | HCRGZJ00       | EU Government          | AN INTEGRATED PROJECT FOR THE DESIGN & TESTING OF VACCINE CANDIDATES AGAINST TUBERCULOSIS:IDENTIFICATION                                                                | Hill, Prof. Adrian     | 01-Jan-2004        | 31-Jan-2010      | 423,711.11   | Other vaccine research              |
| Jenner Vaccine Foundation                                   | HCRJPL00       | UK Charity (no QR)     | EJIVR fellowship                                                                                                                                                        | Hill, Prof. Adrian     | 01-Aug-2005        | 30-Sep-2014      | 12,723.28    | Not relevant to ChAdOx              |
| Jenner Vaccine Foundation                                   | HCRJPL00       | UK Charity (no QR)     | EJIVR fellowship                                                                                                                                                        | Hill, Prof. Adrian     | 01-Aug-2005        | 30-Sep-2014      | 247,066.09   | Not relevant to ChAdOx              |
| Jenner Vaccine Foundation                                   | HCRJPL00       | UK Charity (no QR)     | EJIVR fellowship                                                                                                                                                        | Hill, Prof. Adrian     | 01-Aug-2005        | 30-Sep-2014      | 597,272.77   | Not relevant to ChAdOx              |
| Foundation for National Institutes of Health                | HCRJFN00       | Non-EU Other           | ENHANCING THE IMMUNOGENICITY AND EFFICACY OF VECTORED VACCINES                                                                                                          | Hill, Prof. Adrian     | 01-Aug-2005        | 30-Nov-2013      | 1,928,792.16 | ChAdOx technology                   |
| Foundation for National Institutes of Health                | HCRJFN00       | Non-EU Other           | ENHANCING THE IMMUNOGENICITY AND EFFICACY OF VECTORED VACCINES                                                                                                          | Hill, Prof. Adrian     | 01-Aug-2005        | 30-Nov-2013      | 390,640.00   | ChAdOx technology                   |
| Foundation for National Institutes of Health                | HCRJFN00       | Non-EU Other           | ENHANCING THE IMMUNOGENICITY AND EFFICACY OF VECTORED VACCINES                                                                                                          | Hill, Prof. Adrian     | 01-Aug-2005        | 30-Nov-2013      | 3,301,513.13 | ChAdOx technology                   |
| Foundation for National Institutes of Health                | HCRJFN00       | Non-EU Other           | ENHANCING THE IMMUNOGENICITY AND EFFICACY OF VECTORED VACCINES                                                                                                          | Hill, Prof. Adrian     | 01-Aug-2005        | 30-Nov-2013      | 108,347.00   | ChAdOx technology                   |
| European Commission                                         | HCRNHU00       | EU Government          | New Preventative and Therapeutic Hepatitis C Vaccines: from pre-clinical to phase 1 (HEPACIVAC)                                                                         | Hill, Prof. Adrian     | 01-Feb-2007        | 06-Nov-2012      | 905,482.61   | Other vaccine research              |
| Department of Health and Social Care                        | HCRNFZ00       | UK Public Sector       | Vaccines Theme                                                                                                                                                          | Hill, Prof. Adrian     | 01-Apr-2007        | 30-Jun-2012      | 1,887,190.90 | ChAdOx technology                   |
| Department of Health and Social Care                        | HCRNFZ00       | UK Public Sector       | Vaccines Theme                                                                                                                                                          | Hill, Prof. Adrian     | 01-Apr-2007        | 30-Jun-2012      | 97,763.92    | ChAdOx technology                   |
| Department of Health and Social Care                        | HCRNFZ00       | UK Public Sector       | Vaccines Theme                                                                                                                                                          | Hill, Prof. Adrian     | 01-Apr-2007        | 30-Jun-2012      | 37,846.92    | ChAdOx technology                   |
| Department of Health and Social Care                        | HCRNFZ00       | UK Public Sector       | Vaccines Theme                                                                                                                                                          | Hill, Prof. Adrian     | 01-Apr-2007        | 30-Jun-2012      | 1,327,807.87 | ChAdOx technology                   |
| Department of Health and Social Care                        | HCRNFZ00       | UK Public Sector       | Vaccines Theme                                                                                                                                                          | Hill, Prof. Adrian     | 01-Apr-2007        | 30-Jun-2012      | 14,760.28    | ChAdOx technology                   |
| Wellcome Trust                                              | HCR0PS00       | UK Charity (QR)        | Human and veterinary vaccinology                                                                                                                                        | Hill, Prof. Adrian     | 01-Jul-2008        | 30-Sep-2013      | 2,500,000.00 | ChAdOx technology                   |
| European & Developing Countries Clinical Trials Partnership | HCRRZ10        | EU Government          | INTEGRATING CAPACITY BUILDING AND NETWORKING IN THE DESIGN AND CONDUCT OF PHASE 1 AND 11 CLINICAL TRIALS OF HILL, Prof. Adrian                                          | Hill, Prof. Adrian     | 01-Nov-2009        | 31-May-2015      | 2,038,038.98 | ChAdOx technology                   |
| European Commission                                         | HCRRVU00       | EU Government          | IDEA: DISSECTING THE IMMUNOLOGICAL INTERPLAY BETWEEN POVERTY RELATED DISEASES AND HELMINTH INFECTIONS: A Hill, Prof. Adrian                                             | Hill, Prof. Adrian     | 01-Mar-2010        | 31-Oct-2015      | 638,805.39   | Other vaccine research              |
| James Martin (Individual)                                   | HCRSKB00       | Non-EU Other           | VACCINE DESIGN INSTITUTE (MATCHED FUNDING)                                                                                                                              | Hill, Prof. Adrian     | 01-Jun-2010        | 31-Aug-2013      | 129,311.00   | Not relevant to ChAdOx              |
| James Martin (Individual)                                   | HCRSKB00       | Non-EU Other           | VACCINE DESIGN INSTITUTE (MATCHED FUNDING)                                                                                                                              | Hill, Prof. Adrian     | 01-Jun-2010        | 31-Aug-2013      | 145,796.00   | Not relevant to ChAdOx              |
| James Martin (Individual)                                   | HCRSKB00       | Non-EU Other           | VACCINE DESIGN INSTITUTE (MATCHED FUNDING)                                                                                                                              | Hill, Prof. Adrian     | 01-Jun-2010        | 31-Aug-2013      | 444,324.00   | Not relevant to ChAdOx              |
| James Martin (Individual)                                   | HCRSKB00       | Non-EU Other           | VACCINE DESIGN INSTITUTE (MATCHED FUNDING)                                                                                                                              | Hill, Prof. Adrian     | 01-Jun-2010        | 31-Aug-2013      | 247,210.00   | Not relevant to ChAdOx              |
| European Vaccine Initiative                                 | HCRUXL00       | EU Government          | Construction and GMP manufacture of AdCh63 CSP and MVA CSP plus clinical trials                                                                                         | Hill, Prof. Adrian     | 01-Aug-2010        | 22-Apr-2014      | 492,082.81   | ChAdOx technology                   |
| Wellcome Trust                                              | HCRUZZ00       | UK Charity (QR)        | T-Cell Inducing Vaccines                                                                                                                                                | Hill, Prof. Adrian     | 01-Sep-2011        | 31-Dec-2014      | 68,228.00    | ChAdOx technology                   |
| Wellcome Trust                                              | HCRUZZ00       | UK Charity (QR)        | T-Cell Inducing Vaccines                                                                                                                                                | Hill, Prof. Adrian     | 01-Sep-2011        | 31-Dec-2014      | 1,304,228.00 | ChAdOx technology                   |
| Name withheld                                               | HCRVJB00       | EU Industry (QR)       | Vaccine Thermostability                                                                                                                                                 | Hill, Prof. Adrian     | 01-Oct-2011        | 28-Feb-2014      | 149,707.00   | ChAdOx technology                   |
| Program for Assessment Technology in Health                 | HCRWJS00       | Non-EU Other           | Clinical Testing of Multi-Antigen Adenovirus-Vectored Malaria Vaccines in Prime-Boost Regimens with DNA and MVA (VAC045)Hill, Prof. Adrian                              | Hill, Prof. Adrian     | 15-Mar-2012        | 31-May-2014      | 574,077.00   | ChAdOx technology                   |
| Department of Health and Social Care                        | HCRWAF00       | UK Public Sector       | BR2C VACCINES THEME                                                                                                                                                     | Hill, Prof. Adrian     | 01-Apr-2012        | 31-May-2015      | 36,468.48    | ChAdOx technology                   |
| Department of Health and Social Care                        | HCRWAF00       | UK Public Sector       | BR2C VACCINES THEME                                                                                                                                                     | Hill, Prof. Adrian     | 01-Apr-2012        | 31-May-2015      | 1,764,079.63 | ChAdOx technology                   |
| Department of Health and Social Care                        | HCRWAF00       | UK Public Sector       | BR2C VACCINES THEME                                                                                                                                                     | Hill, Prof. Adrian     | 01-Apr-2012        | 31-May-2015      | 933,269.78   | ChAdOx technology                   |
| European Commission                                         | HCRWMY00       | EU Government          | Immunogenetics of Severe Bacterial Disease Susceptibility and Vaccine Responses in Humans                                                                               | Hill, Prof. Adrian     | 01-Jun-2012        | 30-Sep-2017      | 1,095,942.39 | Other vaccine research              |
| European Commission                                         | HCRWMY00       | EU Government          | Immunogenetics of Severe Bacterial Disease Susceptibility and Vaccine Responses in Humans                                                                               | Hill, Prof. Adrian     | 01-Jun-2012        | 30-Sep-2017      | 243,881.65   | Other vaccine re Hill, Prof. Adrian |
| European Commission                                         | HCRXKA00       | EU Government          | MULTIMALVAX - A MULTI STAGE MALARIA VACCINE                                                                                                                             | Hill, Prof. Adrian     | 01-Oct-2012        | 20-Jul-2017      | 3,696,129.35 | ChAdOx technology                   |
| James Martin 21st Century Foundation                        | HCRXNO10       | Non-EU Other           | Vaccines To Tackle Variable Pathogens: Transforming Immunisation Effectiveness in the 21st Century                                                                      | Hill, Prof. Adrian     | 01-Oct-2012        | 30-Nov-2015      | 28,930.00    | Not relevant to ChAdOx              |
| James Martin 21st Century Foundation                        | HCRXNO10       | Non-EU Other           | Vaccines To Tackle Variable Pathogens: Transforming Immunisation Effectiveness in the 21st Century                                                                      | Hill, Prof. Adrian     | 01-Oct-2012        | 30-Nov-2015      | 121,073.62   | Not relevant to ChAdOx              |
| James Martin 21st Century Foundation                        | HCRXNO10       | Non-EU Other           | Vaccines To Tackle Variable Pathogens: Transforming Immunisation Effectiveness in the 21st Century                                                                      | Hill, Prof. Adrian     | 01-Oct-2012        | 30-Nov-2015      | 6,390.00     | Not relevant to ChAdOx              |
| James Martin 21st Century Foundation                        | HCRXNO10       | Non-EU Other           | Vaccines To Tackle Variable Pathogens: Transforming Immunisation Effectiveness in the 21st Century                                                                      | Hill, Prof. Adrian     | 01-Oct-2012        | 30-Nov-2015      | 13,950.00    | Not relevant to ChAdOx              |
| James Martin 21st Century Foundation                        | HCRXNO10       | Non-EU Other           | Vaccines To Tackle Variable Pathogens: Transforming Immunisation Effectiveness in the 21st Century                                                                      | Hill, Prof. Adrian     | 01-Oct-2012        | 30-Nov-2015      | 30,000.00    | Not relevant to ChAdOx              |
| James Martin 21st Century Foundation                        | HCRXNO10       | Non-EU Other           | Vaccines To Tackle Variable Pathogens: Transforming Immunisation Effectiveness in the 21st Century                                                                      | Hill, Prof. Adrian     | 01-Oct-2012        | 30-Nov-2015      | 30,000.00    | Not relevant to ChAdOx              |
| James Martin 21st Century Foundation                        | HCRXNO10       | Non-EU Other           | Vaccines To Tackle Variable Pathogens: Transforming Immunisation Effectiveness in the 21st Century                                                                      | Hill, Prof. Adrian     | 01-Oct-2012        | 30-Nov-2015      | 106,032.38   | Not relevant to ChAdOx              |
| James Martin 21st Century Foundation                        | HCRXNO10       | Non-EU Other           | Vaccines To Tackle Variable Pathogens: Transforming Immunisation Effectiveness in the 21st Century                                                                      | Hill, Prof. Adrian     | 01-Oct-2012        | 30-Nov-2015      | 109,486.00   | Not relevant to ChAdOx              |
| James Martin 21st Century Foundation                        | HCRXNO10       | Non-EU Other           | Vaccines To Tackle Variable Pathogens: Transforming Immunisation Effectiveness in the 21st Century                                                                      | Hill, Prof. Adrian     | 01-Oct-2012        | 30-Nov-2015      | 4,138.00     | Not relevant to ChAdOx              |
| European & Developing Countries Clinical Trials Partnership | HCRYL100       | EU Government          | FIELD TRIALS OF A NEW COMBINATION MALARIA VACCINE IN WEST AFRICAN ADULTS AND CHILDREN (MVVC2)                                                                           | Hill, Prof. Adrian     | 01-Nov-2012        | 30-Nov-2015      | 171,708.16   | Other vaccine research              |
| European Commission                                         | HCRZBY00       | EU Government          | VACTRAIN - Training network for next generation vaccinologists                                                                                                          | Hill, Prof. Adrian     | 01-Nov-2012        | 28-Feb-2017      | 178,033.83   | Other vaccine research              |
| European Commission                                         | HCRZBY00       | EU Government          | VACTRAIN - Training network for next generation vaccinologists                                                                                                          | Hill, Prof. Adrian     | 01-Nov-2012        | 28-Feb-2017      | 302,698.29   | ChAdOx technology                   |
| Medical Research Council                                    | HCRXMA00       | Research Councils      | CLINICAL ASSESSMENT OF A NOVEL SIMIAN ADENOVIRUS-VECTORED INFLUENZA VACCINE DESIGNED TO INDUCE BROADLY Hill, Prof. Sarah                                                | Gilbert, Prof. Sarah   | 01-Dec-2012        | 31-Jul-2016      | 793,588.40   | ChAdOx technology                   |
| Bill & Melinda Gates Foundation                             | HCRXKG00       | Multiple Funding Types | VAC052 - MVI PATH. ADRIAN HILL                                                                                                                                          | Hill, Prof. Adrian     | 01-Dec-2012        | 31-Jan-2015      | 580,650.41   | ChAdOx technology                   |
| Medical Research Council                                    | HCRXWV00       | Research Councils      | DCS- CLINICAL EVALUATION OF A SPOROZITE AND LIVER STAGE COMBINATION VACCINE FOR PLASMODIUM FALCIPARUM Hill, Prof. Adrian                                                | Hill, Prof. Adrian     | 31-Dec-2012        | 30-Apr-2016      | 916,661.20   | Other vaccine research              |
| Bill & Melinda Gates Foundation                             | HCR00500       | Non-EU Other           | VAC 055 - A phase IIIa Sporozite challenge study to assess the protective efficacy of the combination malaria vaccine candidate regime of RTS, S.Hill, Prof. Adrian     | Hill, Prof. Adrian     | 01-May-2013        | 28-Feb-2015      | 1,034,359.94 | ChAdOx technology                   |
| Bill & Melinda Gates Foundation                             | HCRYOT00       | Non-EU Charity (QR)    | VAC 055 - A PHASE IIIa SPOROZITE CHALLENGE STUDY TO ASSESS THE PROTECTIVE EFFICACY OF THE COMBINATION MALARI Hill, Prof. Adrian                                         | Hill, Prof. Adrian     | 01-May-2013        | 30-Jun-2014      | 0.00         | ChAdOx technology                   |
| Wellcome Trust                                              | HCRYBS00       | UK Charity (QR)        | ADVANCING HUMAN & VETERINARY VACCINOLOGY                                                                                                                                | Hill, Prof. Adrian     | 30-Jun-2013        | 31-May-2017      | 940,440.51   | Not relevant to ChAdOx              |
| Wellcome Trust                                              | HCRYBS00       | UK Charity (QR)        | ADVANCING HUMAN & VETERINARY VACCINOLOGY                                                                                                                                | Hill, Prof. Adrian     | 30-Jun-2013        | 31-May-2017      | 1,119,151.49 | Not relevant to ChAdOx              |
| Innovate UK                                                 | HCRZJK00       | UK Public Sector       | Development of a novel VLP based vaccine for malaria                                                                                                                    | Hill, Prof. Adrian     | 01-Sep-2013        | 31-Oct-2014      | 99,998.08    | Other vaccine research              |
| Wellcome Trust                                              | HCR00040       | UK Charity (QR)        | An investigation of cell dynamics, migration and differentiation resulting in the generation of a CD8+ T-cell memory response following vaccination Hill, Prof. Adrian  | Hill, Prof. Adrian     | 01-Oct-2013        | 30-Nov-2017      | 80,000.00    | ChAdOx technology                   |
| Animal Health and Veterinary Laboratories Agency            | HCR00200       | UK Public Sector       | Influenza project - Jenner fellow                                                                                                                                       | Gilbert, Prof. Sarah   | 01-Jan-2014        | 28-Feb-2017      | 65,038.79    | Not relevant to ChAdOx              |
| Name withheld                                               | HCR00100       | UK Industry (QR)       | H1N1_CS_01 clinical study                                                                                                                                               | Gilbert, Prof. Sarah   | 01-Feb-2014        | 31-Dec-2014      | 114,226.00   | ChAdOx technology                   |
| European Commission                                         | HCR00120       | EU Government          | Improving prostate Cancer Outcomes with Vectored Vaccines                                                                                                               | Hill, Prof. Adrian     | 01-Apr-2014        | 15-Nov-2019      | 3,435,675.99 | ChAdOx technology                   |
| European Commission                                         | HCR00120       | EU Government          | Improving prostate Cancer Outcomes with Vectored Vaccines                                                                                                               | Hill, Prof. Adrian     | 01-Apr-2014        | 15-Nov-2019      | 18,872.52    | ChAdOx technology                   |
| Biotechnology & Biological Sciences Research Council        | HCR00260       | Research Councils      | Understanding Influenza: A virus: linking transmission, evolutionary dynamics, pathogenesis and immunity in pigs                                                        | Gilbert, Prof. Sarah   | 01-Apr-2014        | 31-May-2019      | 44,838.00    | Other vaccine research              |
| Program for Appropriate Technology in Health (PATH)         | HCR00170       | Non-EU Other           | A phase IIIa sporozite challenge study to assess the safety and protective efficacy of concomitant administration of the Combination Malaria Va Hill, Prof. Adrian      | Hill, Prof. Adrian     | 15-May-2014        | 31-Mar-2015      | 271,432.82   | ChAdOx technology                   |
| Wellcome Trust                                              | HCR00240       | Split-Funded           | Accelerated Clinical Evaluation of a Monovalent Vectored Ebola vaccine                                                                                                  | Hill, Prof. Adrian     | 01-Sep-2014        | 28-Feb-2017      | 2,820,000.00 | ChAdOx technology                   |
| Wellcome Trust                                              | HCR00340       | UK Charity (QR)        | A multi-component high efficacy malaria vaccine                                                                                                                         | Hill, Prof. Adrian     | 01-Sep-2014        | 31-Oct-2019      | 53,470.15    | ChAdOx technology                   |
| Wellcome Trust                                              | HCR00340       | UK Charity (QR)        | A multi-component high efficacy malaria vaccine                                                                                                                         | Hill, Prof. Adrian     | 01-Sep-2014        | 31-Oct-2019      | 1,923,079.63 | ChAdOx technology                   |
| Name withheld                                               | HCR00171       | Non-EU Other           | A Phase IIIa Sporozite Challenge study to assess the safety and protective efficacy of concomitant administration of the combination malaria vaccine Hill, Prof. Adrian | Hill, Prof. Adrian     | 01-Oct-2014        | 30-Nov-2016      | 1,165,941.27 | ChAdOx technology                   |
| European Commission                                         | HCR00230       | EU Government          | Development of a Chimpanzee Adenovirus Type 3 Ebola virus Zaire Vaccine                                                                                                 | Hill, Prof. Adrian     | 07-Oct-2014        | 31-Jul-2018      | 698,208.30   | ChAdOx technology                   |
| Wellcome Trust                                              | HCR00310       | UK Charity (QR)        | Large Scale Biomanufacture of a Monovalent Ebola MVA Vector and Heterologous Boosting of Primed Subjects in Mali and the UK                                             | Hill, Prof. Adrian     | 01-Dec-2014        | 28-Feb-2017      | 2,170,000.00 | Other vaccine research              |
| European Commission                                         | HCR00250       | EU Government          | Standardization & development of assays for assessment of influenza vaccine correlates of protection                                                                    | Gilbert, Prof. Sarah   | 01-Mar-2015        | 30-Apr-2021      | 90,006.02    | Other vaccine research              |
| NiHR Biomedical Research Centre                             | HCRWAF04       | UK Public Sector       | BR2C Vaccines Theme Year 4                                                                                                                                              | Hill, Prof. Adrian     | 01-Apr-2015        | 31-May-2016      | 172,911.59   | ChAdOx technology                   |
| NiHR Biomedical Research Centre                             | HCRWAF04       | UK Public Sector       | BR2C Vaccines Theme Year 4                                                                                                                                              | Hill, Prof. Adrian     | 01-Apr-2015        | 31-May-2016      | 438,045.00   | ChAdOx technology                   |
| NiHR Biomedical Research Centre                             | HCRWAF04       | UK Public Sector       | BR2C Vaccines Theme Year 4                                                                                                                                              | Hill, Prof. Adrian     | 01-Apr-2015        | 31-May-2016      | 299,291.00   | ChAdOx technology                   |
| Janssen Vaccines & Prevention B.V.                          | HCR00480       | EU Industry (QR)       | RELATING TO A PHASE I SAFETY AND IMMUNOGENICITY TRIAL OF THE HETEROLOGOUS PRIME-BOOST REGIMEN COMBINING Hill, Prof. Adrian                                              | Hill, Prof. Adrian     | 01-May-2015        | 28-Feb-2020      | 343,921.36   | ChAdOx technology                   |
| Name withheld                                               | HCR00481       | EU Industry (QR)       | RELATING TO A PHASE I SAFETY AND IMMUNOGENICITY TRIAL OF THE HETEROLOGOUS PRIME-BOOST REGIMEN COMBINING Hill, Prof. Adrian                                              | Hill, Prof. Adrian     | 01-May-2015        | 28-Feb-2020      | 0.00         | ChAdOx technology                   |
| Name withheld                                               | HCR00481       | EU Industry (QR)       | RELATING TO A PHASE I SAFETY AND IMMUNOGENICITY TRIAL OF THE HETEROLOGOUS PRIME-BOOST REGIMEN COMBINING Hill, Prof. Adrian                                              | Hill, Prof. Adrian     | 01-May-2015        | 28-Feb-2020      | 343,921.37   | ChAdOx technology                   |

|                                                      |          |                      |                                                                                                                                        |                       |             |             |              |                        |
|------------------------------------------------------|----------|----------------------|----------------------------------------------------------------------------------------------------------------------------------------|-----------------------|-------------|-------------|--------------|------------------------|
| Biotechnology & Biological Sciences Research Council | HCR00410 | Research Councils    | Stabilisation of Newcastle disease vaccine formulated in sugar-glass on polypropylene membranes                                        | Hill, Prof. Adrian    | 01-Jun-2015 | 31-Jan-2017 | 82,989.96    | Other vaccine research |
| Biotechnology & Biological Sciences Research Council | HCR00410 | Research Councils    | Stabilisation of Newcastle disease vaccine formulated in sugar-glass on polypropylene membranes                                        | Hill, Prof. Adrian    | 01-Jun-2015 | 31-Jan-2017 | 57,855.44    | Other vaccine research |
| Jenner Vaccine Foundation                            | HCR00450 | UK Charity (no QR)   | JVF Public Engagement Award                                                                                                            | Hill, Prof. Adrian    | 01-Jul-2015 | 28-Feb-2017 | 50,000.00    | Not relevant to ChAdOx |
| Name withheld                                        | HCR00500 | UK Industry (QR)     | Agreement for the manufacture of a vaccine for use in clinical trials relating to ChAdOx2                                              | Gilbert, Prof. Sarah  | 03-Aug-2015 | 28-Feb-2017 | 918,721.00   | ChAdOx technology      |
| Name withheld                                        | HCR00530 | UK Industry (QR)     | In support of the manufacture of MVA HAV for use in clinical trials and related toxicology testing/clinical trial support activities   | Gilbert, Prof. Sarah  | 01-Oct-2015 | 31-Jul-2020 | 424,033.35   | Other vaccine research |
| Name withheld                                        | HCR00531 | UK Industry (QR)     | In support of the manufacture of MVA HAV for use in clinical trials and related toxicology testing/clinical trial support activities   | Gilbert, Prof. Sarah  | 01-Oct-2015 | 30-Nov-2018 | 52,622.40    | Other vaccine research |
| Jenner Vaccine Foundation                            | HCR00630 | UK Charity (no QR)   | Jenner Vaccine Foundation                                                                                                              | Hill, Prof. Adrian    | 01-Jan-2016 | 28-Feb-2017 | 93,000.00    | Not relevant to ChAdOx |
| Name withheld                                        | HCR00730 | EU Industry (QR)     | Preparatory activities in support of the FLU007 clinical trial                                                                         | Gilbert, Prof. Sarah  | 01-Feb-2016 | 30-Sep-2016 | 46,242.49    | Other vaccine research |
| Medical Research Council                             | HCR00670 | Research Councils    | Pre-clinical development of an influenza vaccine to induce broad protection through multiple immune mechanisms                         | Gilbert, Prof. Sarah  | 01-Mar-2016 | 31-Jul-2018 | 379,318.93   | ChAdOx technology      |
| Medical Research Council                             | HCR00670 | Research Councils    | Pre-clinical development of an influenza vaccine to induce broad protection through multiple immune mechanisms                         | Gilbert, Prof. Sarah  | 01-Mar-2016 | 31-Jul-2018 | 300,241.00   | ChAdOx technology      |
| NHRR Biomedical Research Centre                      | HCRWAF05 | UK Public Sector     | BRC2 Vaccines Theme Year 5                                                                                                             | Hill, Prof. Adrian    | 01-Apr-2016 | 31-May-2017 | 172,912.00   | ChAdOx technology      |
| NHRR Biomedical Research Centre                      | HCRWAF05 | UK Public Sector     | BRC2 Vaccines Theme Year 5                                                                                                             | Hill, Prof. Adrian    | 01-Apr-2016 | 31-May-2017 | 438,223.10   | ChAdOx technology      |
| NHRR Biomedical Research Centre                      | HCRWAF05 | UK Public Sector     | BRC2 Vaccines Theme Year 5                                                                                                             | Hill, Prof. Adrian    | 01-Apr-2016 | 31-May-2017 | 296,014.03   | ChAdOx technology      |
| Wellcome Trust                                       | HCR00720 | UK Charity (QR)      | Prime-Target Vaccination in Malaria                                                                                                    | Hill, Prof. Adrian    | 01-Jun-2016 | 31-Oct-2019 | 201,600.00   | ChAdOx technology      |
| Name withheld                                        | HCR00940 | UK Industry (QR)     | INVICTUS Year 1 costs                                                                                                                  | Gilbert, Prof. Sarah  | 01-Aug-2016 | 28-Feb-2018 | 384,306.14   | Other vaccine research |
| Name withheld                                        | HCR00940 | UK Industry (QR)     | INVICTUS Year 1 costs                                                                                                                  | Gilbert, Prof. Sarah  | 01-Aug-2016 | 28-Feb-2018 | 151,549.02   | Other vaccine research |
| Medical Research Council                             | HSR00610 | Research Councils    | The Mexican Biobank Project: Building Capacity for Big Data Science in Medical Genomics in Admixed Populations                         | Hill, Prof. Adrian    | 14-Aug-2016 | 18-Nov-2020 | 191,033.58   | Other vaccine research |
| Medical Research Council                             | HSR00610 | Research Councils    | The Mexican Biobank Project: Building Capacity for Big Data Science in Medical Genomics in Admixed Populations                         | Hill, Prof. Adrian    | 14-Aug-2016 | 18-Nov-2020 | 316,308.00   | Other vaccine research |
| Medical Research Council                             | HCR00810 | Research Councils    | Development of a novel biocompatible matrix for sugar membrane technology for thermostability of an adjuvanted malaria vaccine         | Hill, Prof. Adrian    | 01-Oct-2016 | 31-May-2018 | 48,239.00    | Other vaccine research |
| EMD Millipore Corporation                            | HCR00910 | Non-EU Industry (QR) | Millipore/Sigma CBF collaboration                                                                                                      | Hill, Prof. Adrian    | 01-Dec-2016 | 31-Jan-2019 | 79,636.07    | Not relevant to ChAdOx |
| EMD Millipore Corporation                            | HCR00910 | Non-EU Industry (QR) | Millipore/Sigma CBF collaboration                                                                                                      | Hill, Prof. Adrian    | 01-Dec-2016 | 31-Jan-2019 | 59,629.45    | Not relevant to ChAdOx |
| Royal Society                                        | HCR01070 | Research Councils    | Transcriptomics of African Fruit Bats in response to Ebola virus antigens                                                              | Gilbert, Prof. Sarah  | 01-Dec-2016 | 31-Jan-2018 | 5,000.00     | Other vaccine research |
| Name withheld                                        | HCR00870 | UK Industry (QR)     | HAV-Trial                                                                                                                              | Gilbert, Prof. Sarah  | 19-Dec-2016 | 28-Feb-2021 | 202,673.09   | ChAdOx technology      |
| European Commission                                  | HCR00890 | EU Government        | Optimizing a deployable high efficacy malaria vaccine                                                                                  | Hill, Prof. Adrian    | 01-Jan-2017 | 28-Feb-2022 | 20,222.39    | ChAdOx technology      |
| European Commission                                  | HCR00890 | EU Government        | Optimizing a deployable high efficacy malaria vaccine                                                                                  | Hill, Prof. Adrian    | 01-Jan-2017 | 28-Feb-2022 | 118,934.30   | ChAdOx technology      |
| European Commission                                  | HCR00890 | EU Government        | Optimizing a deployable high efficacy malaria vaccine                                                                                  | Hill, Prof. Adrian    | 01-Jan-2017 | 28-Feb-2022 | 0.01         | ChAdOx technology      |
| European Commission                                  | HCR00890 | EU Government        | Optimizing a deployable high efficacy malaria vaccine                                                                                  | Hill, Prof. Adrian    | 01-Jan-2017 | 28-Feb-2022 | 588,846.64   | ChAdOx technology      |
| European Commission                                  | HCR00890 | EU Government        | Optimizing a deployable high efficacy malaria vaccine                                                                                  | Hill, Prof. Adrian    | 01-Jan-2017 | 28-Feb-2022 | 495,448.15   | ChAdOx technology      |
| European Commission                                  | HCR00890 | EU Government        | Optimizing a deployable high efficacy malaria vaccine                                                                                  | Hill, Prof. Adrian    | 01-Jan-2017 | 28-Feb-2022 | 980,784.98   | ChAdOx technology      |
| European Commission                                  | HCR00890 | EU Government        | Optimizing a deployable high efficacy malaria vaccine                                                                                  | Hill, Prof. Adrian    | 01-Jan-2017 | 28-Feb-2022 | 717,894.57   | ChAdOx technology      |
| European Commission                                  | HCR00890 | EU Government        | Optimizing a deployable high efficacy malaria vaccine                                                                                  | Hill, Prof. Adrian    | 01-Jan-2017 | 28-Feb-2022 | 788,672.49   | ChAdOx technology      |
| European Commission                                  | HCR00890 | EU Government        | Optimizing a deployable high efficacy malaria vaccine                                                                                  | Hill, Prof. Adrian    | 01-Jan-2017 | 28-Feb-2022 | 3,033,815.56 | ChAdOx technology      |
| European Commission                                  | HCR00890 | EU Government        | Optimizing a deployable high efficacy malaria vaccine                                                                                  | Hill, Prof. Adrian    | 01-Jan-2017 | 28-Feb-2022 | 850,687.38   | ChAdOx technology      |
| European Commission                                  | HCR00890 | EU Government        | Optimizing a deployable high efficacy malaria vaccine                                                                                  | Hill, Prof. Adrian    | 01-Jan-2017 | 28-Feb-2022 | 1,484,179.25 | ChAdOx technology      |
| European Commission                                  | HCR00890 | EU Government        | Optimizing a deployable high efficacy malaria vaccine                                                                                  | Hill, Prof. Adrian    | 01-Jan-2017 | 28-Feb-2022 | 910,006.65   | ChAdOx technology      |
| European Commission                                  | HCR00890 | EU Government        | Optimizing a deployable high efficacy malaria vaccine                                                                                  | Hill, Prof. Adrian    | 01-Jan-2017 | 28-Feb-2022 | 547,708.05   | ChAdOx technology      |
| Jenner Vaccine Foundation                            | HCR00900 | UK Charity (no QR)   | Jenner Investigator Allowance                                                                                                          | Hill, Prof. Adrian    | 01-Jan-2017 | 10-Mar-2018 | 105,000.00   | Not relevant to ChAdOx |
| Name withheld                                        | HCR00920 | UK Industry (QR)     | Process Development for manufacturing personalised vaccines                                                                            | Gilbert, Prof. Sarah  | 01-Feb-2017 | 28-Feb-2019 | 399,708.45   | Not relevant to ChAdOx |
| Wellcome Trust                                       | HCR01170 | UK Charity (QR)      | Development of a high efficacy vaccine against P.falciparum malaria                                                                    | Hill, Prof. Adrian    | 01-Feb-2017 | 30-Nov-2022 | 0.01         | ChAdOx technology      |
| Wellcome Trust                                       | HCR01170 | UK Charity (QR)      | Development of a high efficacy vaccine against P.falciparum malaria                                                                    | Hill, Prof. Adrian    | 01-Feb-2017 | 30-Nov-2022 | 3,610,734.99 | ChAdOx technology      |
| Wellcome Trust                                       | HCR01170 | UK Charity (QR)      | Development of a high efficacy vaccine against P.falciparum malaria                                                                    | Hill, Prof. Adrian    | 01-Feb-2017 | 30-Nov-2022 | 1,554,265.00 | ChAdOx technology      |
| Oxford Biomedical Research Centre                    | HCR00951 | UK Public Sector     | BRC3 - Vaccines for Emerging & Endemic Diseases - Year 1                                                                               | Hill, Prof. Adrian    | 01-Apr-2017 | 31-May-2018 | 63,864.00    | ChAdOx technology      |
| Oxford Biomedical Research Centre                    | HCR00951 | UK Public Sector     | BRC3 - Vaccines for Emerging & Endemic Diseases - Year 1                                                                               | Hill, Prof. Adrian    | 01-Apr-2017 | 31-May-2018 | 588,273.00   | ChAdOx technology      |
| Oxford Biomedical Research Centre                    | HCR00951 | UK Public Sector     | BRC3 - Vaccines for Emerging & Endemic Diseases - Year 1                                                                               | Hill, Prof. Adrian    | 01-Apr-2017 | 31-May-2018 | 279,753.00   | ChAdOx technology      |
| European Commission                                  | HCR01110 | EU Government        | European Vaccine Research and Development Infrastructure (TRANSVAC2)                                                                   | Hill, Prof. Adrian    | 01-May-2017 | 30-Jun-2022 | 107,313.89   | Not relevant to ChAdOx |
| European Commission                                  | HCR01110 | EU Government        | European Vaccine Research and Development Infrastructure (TRANSVAC2)                                                                   | Hill, Prof. Adrian    | 01-May-2017 | 30-Jun-2022 | 414,623.64   | Not relevant to ChAdOx |
| Innovate UK                                          | HCR01100 | UK Public Sector     | Preclinical Crimean Congo Haemorrhagic Fever Vaccine Development                                                                       | Gilbert, Prof. Sarah  | 15-May-2017 | 14-Jul-2018 | 350,780.00   | ChAdOx technology      |
| Name withheld                                        | HCR01090 | UK Industry (QR)     | A phase 1 study to determine the safety and immunogenicity influenza vaccine MVA-NP+M1, manufactured on the AGE1.CR.pIX non-avian cell | Gilbert, Prof. Sarah  | 08-Jun-2017 | 13-Mar-2018 | 63,426.26    | Other vaccine research |
| United States Agency for International Development   | HCR01080 | Non-EU Other         | Rebecca Ashfield Leeds April 17                                                                                                        | Ashfield, Dr. Rebecca | 14-Jun-2017 | 30-Aug-2019 | 66,925.52    | Other vaccine research |
| Name withheld                                        | HCR01140 | UK Industry (QR)     | INVICTUS Main Trial                                                                                                                    | Gilbert, Prof. Sarah  | 09-Aug-2017 | 30-Nov-2019 | 1,688,717.96 | Other vaccine research |
| Name withheld                                        | HCR01140 | UK Industry (QR)     | INVICTUS Main Trial                                                                                                                    | Gilbert, Prof. Sarah  | 09-Aug-2017 | 30-Nov-2019 | 130,328.95   | Other vaccine research |
| Name withheld                                        | HCR01230 | UK Industry (QR)     | Costs relating to GMP storage of Vaccitech's IMP products                                                                              | Gilbert, Prof. Sarah  | 30-Aug-2017 | 29-Oct-2022 | 98,318.67    | Not relevant to ChAdOx |
| Jenner Vaccine Foundation                            | HCR01120 | UK Charity (no QR)   | Public Engagement - Jenner                                                                                                             | Hill, Prof. Adrian    | 01-Sep-2017 | 28-Feb-2018 | 22,200.00    | Not relevant to ChAdOx |
| Medical Research Council                             | HCR01130 | Research Councils    | Development and testing of MVA VerOx                                                                                                   | Gilbert, Prof. Sarah  | 01-Sep-2017 | 30-Apr-2019 | 46,598.47    | Other vaccine research |
| Innovate UK                                          | HCR01240 | UK Public Sector     | A Nipah vaccine to eliminate porcine reservoirs and safeguard human health                                                             | Gilbert, Prof. Sarah  | 01-Sep-2017 | 31-May-2021 | 53,374.03    | ChAdOx technology      |
| Medical Research Council                             | HCR01180 | Research Councils    | Clinical Evaluation of "Prime-Target" Immunisation                                                                                     | Hill, Prof. Adrian    | 01-Feb-2018 | 30-Jun-2019 | 670,257.42   | Other vaccine research |
| Biotechnology & Biological Sciences Research Council | HCR01190 | Research Councils    | A single dose vectored Tania solium vaccine                                                                                            | Hill, Prof. Adrian    | 06-Mar-2018 | 05-May-2019 | 26,800.00    | ChAdOx technology      |
| Oxford Biomedical Research Centre                    | HCR00952 | UK Public Sector     | BRC3 - Vaccines for Emerging & Endemic Diseases - Year 2                                                                               | Hill, Prof. Adrian    | 01-Apr-2018 | 31-May-2019 | 67,895.00    | ChAdOx technology      |
| Oxford Biomedical Research Centre                    | HCR00952 | UK Public Sector     | BRC3 - Vaccines for Emerging & Endemic Diseases - Year 2                                                                               | Hill, Prof. Adrian    | 01-Apr-2018 | 31-May-2019 | 564,335.00   | ChAdOx technology      |
| Oxford Biomedical Research Centre                    | HCR00952 | UK Public Sector     | BRC3 - Vaccines for Emerging & Endemic Diseases - Year 2                                                                               | Hill, Prof. Adrian    | 01-Apr-2018 | 31-May-2019 | 294,005.00   | ChAdOx technology      |
| European Commission                                  | HCR01350 | EU Government        | Multi-Stage Malaria Vaccine Consortium: field efficacy testing of a multi-stage malaria vaccine MMVC                                   | Hill, Prof. Adrian    | 01-Apr-2018 | 30-Nov-2023 | 2,110,089.62 | ChAdOx technology      |
| European Commission                                  | HCR01350 | EU Government        | Multi-Stage Malaria Vaccine Consortium: field efficacy testing of a multi-stage malaria vaccine MMVC                                   | Hill, Prof. Adrian    | 01-Apr-2018 | 30-Nov-2023 | 2,886,824.83 | ChAdOx technology      |
| European Commission                                  | HCR01350 | EU Government        | Multi-Stage Malaria Vaccine Consortium: field efficacy testing of a multi-stage malaria vaccine MMVC                                   | Hill, Prof. Adrian    | 01-Apr-2018 | 30-Nov-2023 | 162,251.10   | ChAdOx technology      |
| Engineering & Physical Sciences Research Council     | HCR01420 | Research Councils    | The Future Vaccine Manufacturing Research Hub                                                                                          | Gilbert, Prof. Sarah  | 01-Apr-2018 | 31-May-2021 | 1,021,747.04 | Not relevant to ChAdOx |
| Engineering & Physical Sciences Research Council     | HCR01420 | Research Councils    | The Future Vaccine Manufacturing Research Hub                                                                                          | Gilbert, Prof. Sarah  | 01-Apr-2018 | 31-May-2021 | 1,580,456.91 | Not relevant to ChAdOx |
| Innovate UK                                          | HCR0210  | UK Public Sector     | An economically viable vaccine for CCHF virus                                                                                          | Gilbert, Prof. Sarah  | 10-Apr-2018 | 30-Sep-2020 | 25,000.00    | Not relevant to ChAdOx |
| European Commission                                  | HCR01260 | EU Government        | Addressing the dual emerging threats of African Swine Fever and lumpy skin disease in Europe                                           | Gilbert, Prof. Sarah  | 01-Jan-2019 | 31-Jan-2023 | 87,350.69    | Other vaccine research |
| Medical Research Council                             | HCR01280 | Research Councils    | Development of a vaccine to prevent Crimean-Congo haemorrhagic fever virus mediated disease.                                           | Gilbert, Prof. Sarah  | 01-Aug-2018 | 31-Oct-2020 | 47,786.83    | Not relevant to ChAdOx |
| Innovate UK                                          | HCR01340 | UK Public Sector     | CCHF Vaccine manufacturing and First in Human Clinical Trial                                                                           | Gilbert, Prof. Sarah  | 01-Sep-2018 | 31-May-2021 | 1,999,524.27 | ChAdOx technology      |
| British Medical Association                          | HSR01110 | UK Industry (QR)     | Defining the role of the human leukocyte antigen locus in susceptibility to rheumatic heart disease in Oceania and South Asia          | Hill, Prof. Adrian    | 01-Sep-2018 | 31-Oct-2021 | 29,960.00    | Other vaccine research |
| British Medical Association                          | HSR01110 | UK Industry (QR)     | Defining the role of the human leukocyte antigen locus in susceptibility to rheumatic heart disease in Oceania and South Asia          | Hill, Prof. Adrian    | 01-Sep-2018 | 31-Oct-2021 | 10,000.00    | Other vaccine research |
| British Medical Association                          | HSR01110 | UK Industry (QR)     | Defining the role of the human leukocyte antigen locus in susceptibility to rheumatic heart disease in Oceania and South Asia          | Hill, Prof. Adrian    | 01-Sep-2018 | 31-Oct-2021 | 10,000.00    | Other vaccine research |
| Coalition for Epidemic Preparedness Innovations      | HCR01320 | Non-EU Other         | PADOVAX- MERS                                                                                                                          | Gilbert, Prof. Sarah  | 01-Oct-2018 | 30-Nov-2023 | 0.01         | ChAdOx technology      |
| Coalition for Epidemic Preparedness Innovations      | HCR01320 | Non-EU Other         | PADOVAX- MERS                                                                                                                          | Gilbert, Prof. Sarah  | 01-Oct-2018 | 30-Nov-2023 | 4,901,551.72 | ChAdOx technology      |

|                                                 |          |                     |                                                                                      |                      |             |             |              |                        |
|-------------------------------------------------|----------|---------------------|--------------------------------------------------------------------------------------|----------------------|-------------|-------------|--------------|------------------------|
| Coalition for Epidemic Preparedness Innovations | HCR01320 | Non-EU Other        | PADOVAX- MERS                                                                        | Gilbert, Prof. Sarah | 01-Oct-2018 | 30-Nov-2023 | 0.00         | ChAdOx technology      |
| Coalition for Epidemic Preparedness Innovations | HCR01320 | Non-EU Other        | PADOVAX- MERS                                                                        | Gilbert, Prof. Sarah | 01-Oct-2018 | 30-Nov-2023 | 0.00         | ChAdOx technology      |
| Coalition for Epidemic Preparedness Innovations | HCR01320 | Non-EU Other        | PADOVAX- MERS                                                                        | Gilbert, Prof. Sarah | 01-Oct-2018 | 30-Nov-2023 | 178,472.28   | ChAdOx technology      |
| Coalition for Epidemic Preparedness Innovations | HCR01320 | Non-EU Other        | PADOVAX- MERS                                                                        | Gilbert, Prof. Sarah | 01-Oct-2018 | 30-Nov-2023 | 7,530.52     | ChAdOx technology      |
| Coalition for Epidemic Preparedness Innovations | HCR01320 | Non-EU Other        | PADOVAX- MERS                                                                        | Gilbert, Prof. Sarah | 01-Oct-2018 | 30-Nov-2023 | 787,489.00   | ChAdOx technology      |
| Coalition for Epidemic Preparedness Innovations | HCR01320 | Non-EU Other        | PADOVAX- MERS                                                                        | Gilbert, Prof. Sarah | 01-Oct-2018 | 30-Nov-2023 | 906,850.08   | ChAdOx technology      |
| Coalition for Epidemic Preparedness Innovations | HCR01320 | Non-EU Other        | PADOVAX- MERS                                                                        | Gilbert, Prof. Sarah | 01-Oct-2018 | 30-Nov-2023 | 2,615,395.66 | ChAdOx technology      |
| Coalition for Epidemic Preparedness Innovations | HCR01321 | Non-EU Other        | PADOVAX-Nipah                                                                        | Gilbert, Prof. Sarah | 01-Oct-2018 | 28-Feb-2021 | 0.01         | ChAdOx technology      |
| Coalition for Epidemic Preparedness Innovations | HCR01321 | Non-EU Other        | PADOVAX-Nipah                                                                        | Gilbert, Prof. Sarah | 01-Oct-2018 | 28-Feb-2021 | 115,718.23   | ChAdOx technology      |
| Coalition for Epidemic Preparedness Innovations | HCR01321 | Non-EU Other        | PADOVAX-Nipah                                                                        | Gilbert, Prof. Sarah | 01-Oct-2018 | 28-Feb-2021 | 0.00         | ChAdOx technology      |
| Coalition for Epidemic Preparedness Innovations | HCR01321 | Non-EU Other        | PADOVAX-Nipah                                                                        | Gilbert, Prof. Sarah | 01-Oct-2018 | 28-Feb-2021 | 475,936.04   | ChAdOx technology      |
| Coalition for Epidemic Preparedness Innovations | HCR01321 | Non-EU Other        | PADOVAX-Nipah                                                                        | Gilbert, Prof. Sarah | 01-Oct-2018 | 28-Feb-2021 | 281,021.66   | ChAdOx technology      |
| Coalition for Epidemic Preparedness Innovations | HCR01321 | Non-EU Other        | PADOVAX-Nipah                                                                        | Gilbert, Prof. Sarah | 01-Oct-2018 | 28-Feb-2021 | 538,467.81   | ChAdOx technology      |
| Coalition for Epidemic Preparedness Innovations | HCR01322 | Non-EU Other        | Potent, scalable adenoviral vectored vaccines against Lassa                          | Gilbert, Prof. Sarah | 01-Oct-2018 | 31-Dec-2020 | 0.01         | ChAdOx technology      |
| Coalition for Epidemic Preparedness Innovations | HCR01322 | Non-EU Other        | Potent, scalable adenoviral vectored vaccines against Lassa                          | Gilbert, Prof. Sarah | 01-Oct-2018 | 31-Dec-2020 | 84,921.38    | ChAdOx technology      |
| Coalition for Epidemic Preparedness Innovations | HCR01322 | Non-EU Other        | Potent, scalable adenoviral vectored vaccines against Lassa                          | Gilbert, Prof. Sarah | 01-Oct-2018 | 31-Dec-2020 | 443,988.95   | ChAdOx technology      |
| Coalition for Epidemic Preparedness Innovations | HCR01322 | Non-EU Other        | Potent, scalable adenoviral vectored vaccines against Lassa                          | Gilbert, Prof. Sarah | 01-Oct-2018 | 31-Dec-2020 | 279,577.40   | ChAdOx technology      |
| Coalition for Epidemic Preparedness Innovations | HCR01322 | Non-EU Other        | Potent, scalable adenoviral vectored vaccines against Lassa                          | Gilbert, Prof. Sarah | 01-Oct-2018 | 31-Dec-2020 | 481,339.45   | ChAdOx technology      |
| Bill & Melinda Gates Foundation                 | HCR01530 | Non-EU Charity (QR) | R21 Variant Malaria Vaccine Candidate                                                | Hill, Prof. Adrian   | 01-Jan-2019 | 31-Jul-2021 | 387,304.92   | Other vaccine research |
| Oxford Biomedical Research Centre               | HCR00953 | UK Public Sector    | BR3 - Vaccines for Emerging & Endemic Diseases - Year 3                              | Hill, Prof. Adrian   | 01-Apr-2019 | 31-May-2020 | 68,147.00    | ChAdOx technology      |
| Oxford Biomedical Research Centre               | HCR00953 | UK Public Sector    | BR3 - Vaccines for Emerging & Endemic Diseases - Year 3                              | Hill, Prof. Adrian   | 01-Apr-2019 | 31-May-2020 | 569,583.00   | ChAdOx technology      |
| Oxford Biomedical Research Centre               | HCR00953 | UK Public Sector    | BR3 - Vaccines for Emerging & Endemic Diseases - Year 3                              | Hill, Prof. Adrian   | 01-Apr-2019 | 31-May-2020 | 303,265.00   | ChAdOx technology      |
| Medical Research Council                        | HCR01490 | Research Councils   | Broad and effective protection against influenza achieved by viral vectored vaccines | Gilbert, Prof. Sarah | 01-May-2019 | 30-Jun-2022 | 768,110.18   | Not relevant to ChAdOx |
| Medical Research Council                        | HCR01490 | Research Councils   | Broad and effective protection against influenza achieved by viral vectored vaccines | Gilbert, Prof. Sarah | 01-May-2019 | 30-Jun-2022 | 839,580.80   | Not relevant to ChAdOx |
| Sepsis Research (FEAT) SCIO                     | HFR01240 | UK Charity (no QR)  | Finding effective targets to modify the host response to sepsis                      | Hill, Prof. Adrian   | 01-Dec-2019 | 31-Mar-2020 | 8,900.00     | Other vaccine research |
